# Supplementary material for: Pickering Emulsion-Based Marbles for Cellular Capsules
Source: Materials (Basel). 2016 Jul 14;9(7):572. doi: 10.3390/ma9070572 (PMC5456839; doi:10.3390/ma9070572)
Supplement: Supplementary file 1 [file materials-09-00572-s001.pdf]

# Supplementary Materials: Pickering Emulsion-Based Marbles for Cellular Capsules

Guangzhao Zhang and Chaoyang Wang

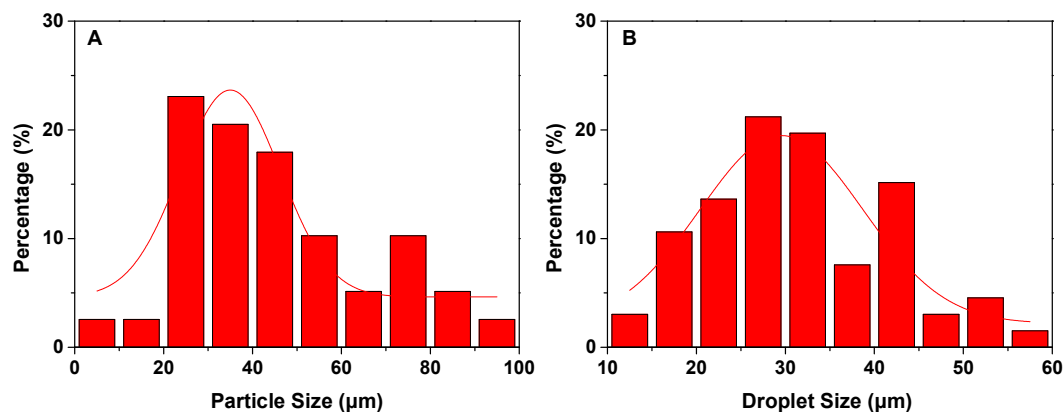

**Figure S1.** Pickering emulsion droplets size distribution with different stabilizer content: (A) 1 w/v % of  $\text{H}_{30}$  silica particles, sample  $\text{P}_{0.02-0.1-2}$ ; (B) 2 w/v % of  $\text{H}_{30}$  silica particles, sample  $\text{P}_{0.04-0.1-2}$ .

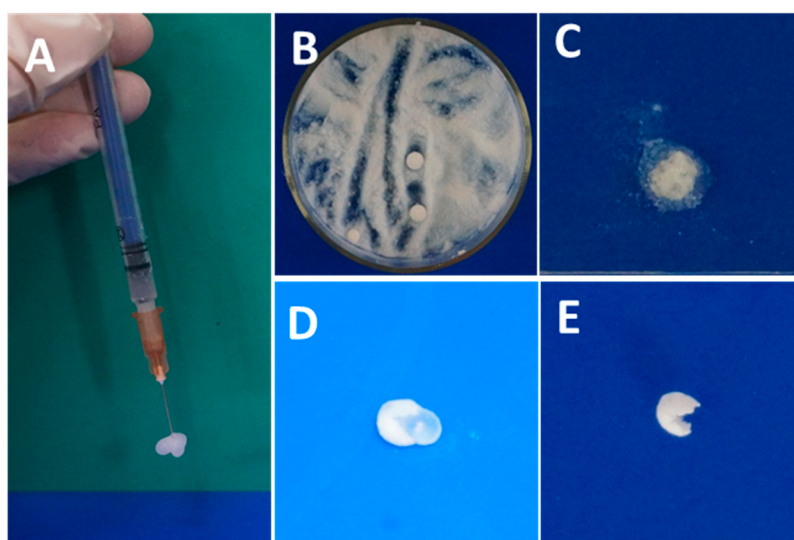

**Figure S2.** (A) the Pickering emulsion was too viscose to be injected dropwise from needle when the concentration of PLLA or stabilizer particles was too high; (B) The preparation of Pickering emulsion marbles via rolling with silica particles; (C) the Pickering emulsion marbles break after transferring to a glass base when the concentration of stabilizer particles was set to 0.5 w/v % (sample  $\text{P}_{0.01-0.1-2}$ ); (D) water phase was extruded out from emulsion marbles when the concentration of stabilizer particles was 1 w/v % (sample  $\text{P}_{0.02-0.1-2}$ ); (E) the formative capsule after dry from marbles in Picture (D).

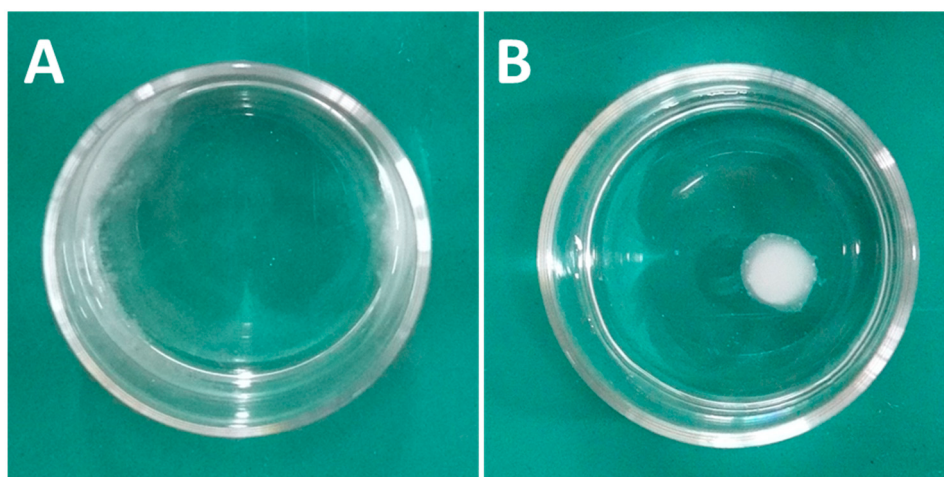

**Figure S3.** Type determination of water in oil Pickering emulsion: (A) in  $\text{CH}_2\text{Cl}_2$  solution; (B) in ultrapure water.

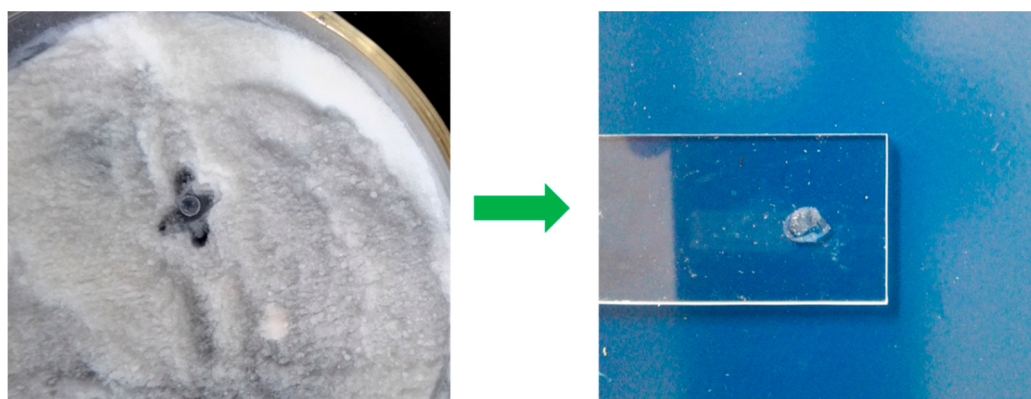

**Figure S4.** The attempt of utilizing pure water to prepare liquid marble with  $\text{H}_{30}$  particles.

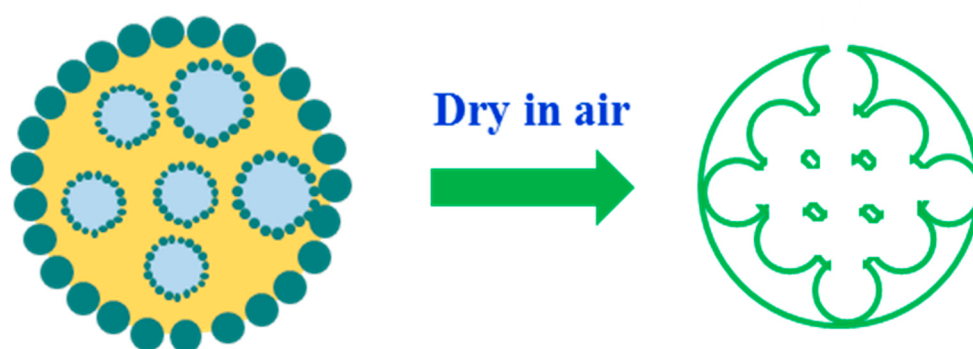

**Figure S5.** The formation mechanism of pores on the surface of capsule.
